# Supplementary material
Source: PubMed Central journal article supplement (PMC4980297)
Supplement: NIHMS750334-supplement-01.pdf [file NIHMS750334-supplement-01.pdf]

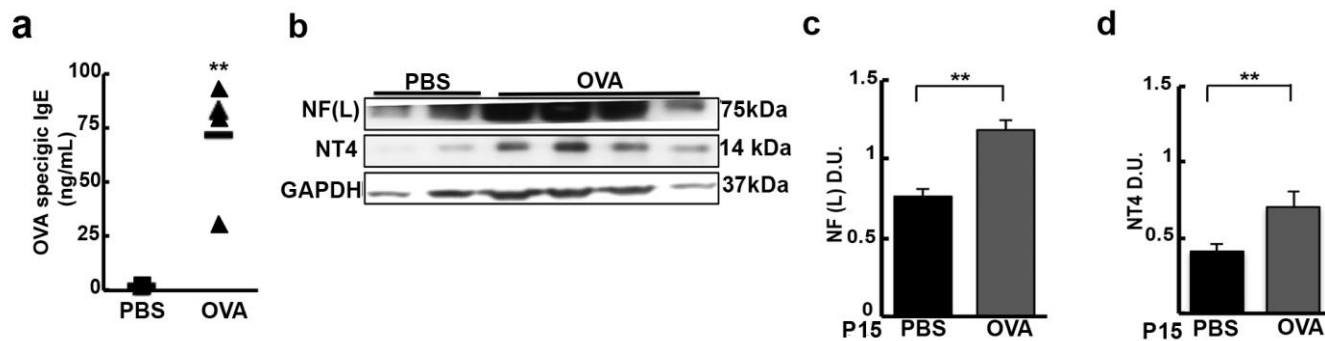

**Figure S1. OVA-sensitized mice show increases in the levels of IgE, airway innervation and NT4 at P15.**

(a) Serum levels of OVA-specific IgE in PBS- and OVA-exposed pups at P15 were measured by ELISA. Each marker represents a sample. Black horizontal line indicates mean of each group. (b) Western blot analysis of neurofilament (NF(L)) (1:200, Cell Signaling, Cat. 28355) and NT4 in lung homogenates collected at P15 from controls and OVA-exposed mice. GAPDH was loading control. Each lane represents 1 mouse sample. (c, d) Densitometry analysis of NF(L) and NT4 levels based on the results of Western blot assays. Data were normalized to GAPDH. \*\*  $P < 0.01$ .

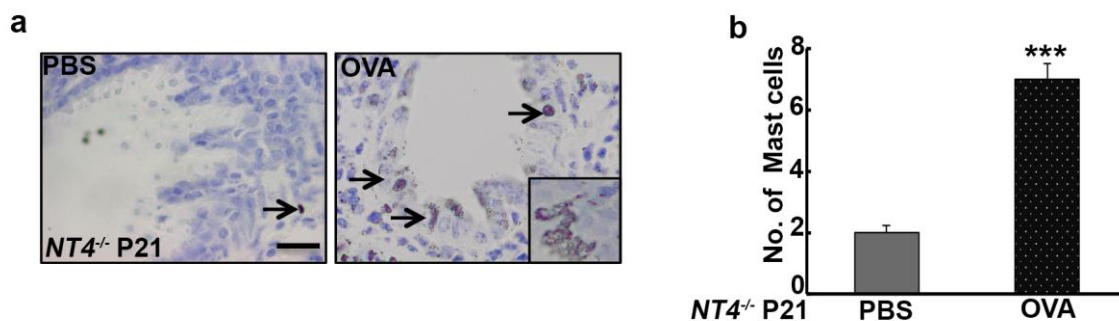

**Figure S2. NT4 deficiency has no effect on mast cell number at baseline and following OVA exposure.**

(a) Toluidine blue staining and quantification for mast cells in control and OVA-exposed lungs in  $NT4^{-/-}$  mice at P21. Arrows point to stained mast cells. Scale bar, 10  $\mu\text{m}$ . Insert provides an enlarged view of spewed granules from a mast cell after OVA exposure. (b) Quantification of mast cell number in  $NT4^{-/-}$  mice at P21. Data represent the average and SEM from 10 non-overlapping, 100X images ( $0.015 \text{ mm}^2$ ) in each mouse lung and 5 mice for each condition.  $NT4^{-/-}$  mice have similar numbers of mast cells in lungs as wild type mice at baseline and following allergen exposure at P21 (shown in **Figure 3c,d**). \*\*\* $P < 0.001$ .

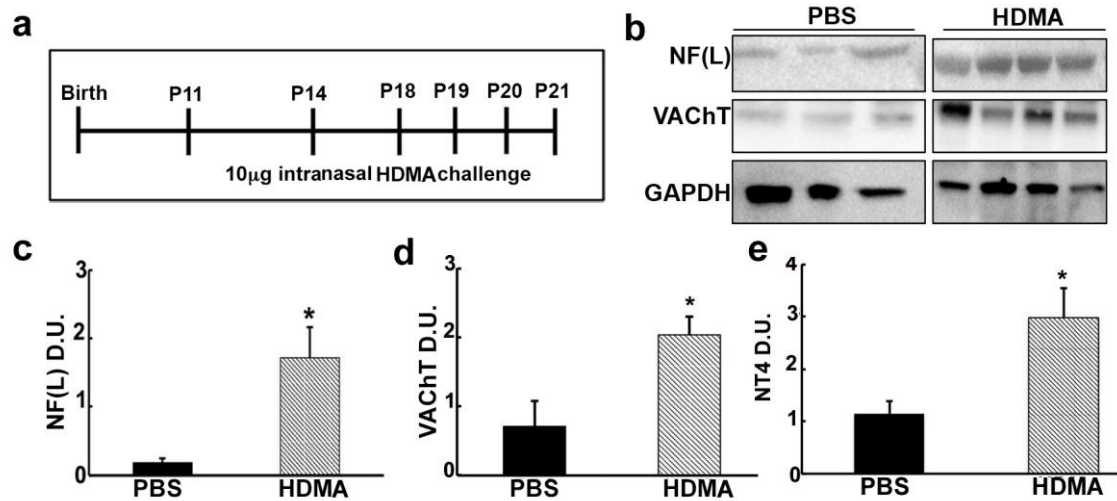

**Figure S3. Early-life exposure to HDMA increases the levels of cholinergic innervation and NT4 at P21.** (a) Experimental scheme of HDMA exposure in neonatal mice. (b) Western blot analysis of NF(L) and VAcHT in lung homogenates collected at P21 from controls and HDMA-exposed mice. GAPDH was loading control. Each lane represents 1 mouse. (c, d). Densitometry analysis of VAcHT and NF(L) signal in the Western blot assay shown in (b). Data were normalized to GAPDH. (e) Quantitation of the NT4 levels in control and HDMA-exposed mice at P21 by Western blot assay. Data were normalized to GAPDH. \* $P < 0.05$ .

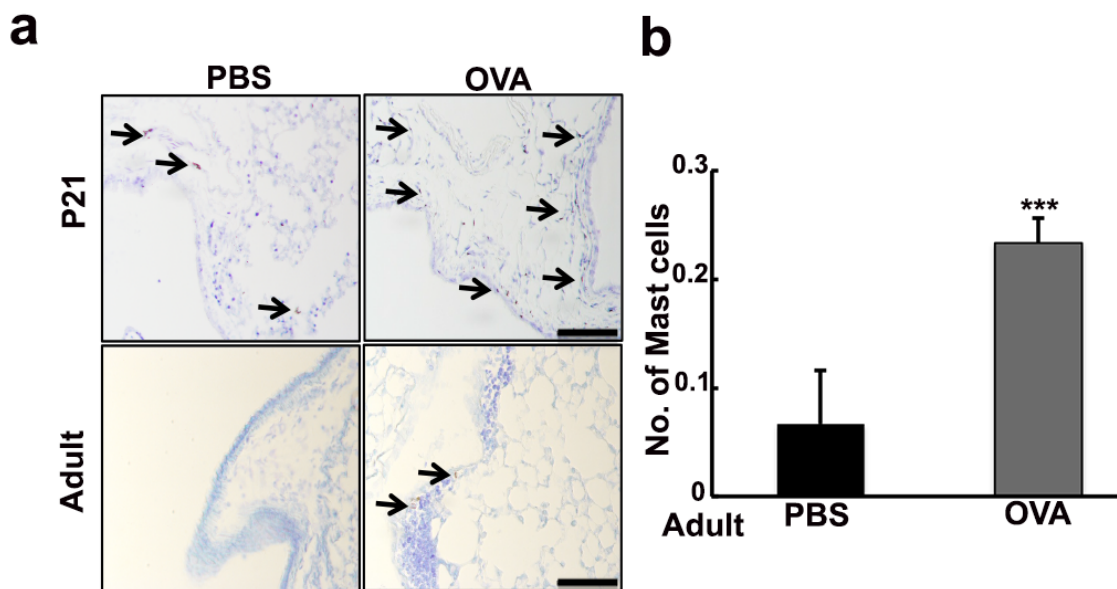

**Figure S4. Neonatal mice have more mast cells in proportion to the size of the lung than adult mice.** (a) Representative images of toluidine blue staining of lung sections in control and OVA-exposed mice at P21 and in adulthood. Arrows point to stained mast cells. Scale bars, 100  $\mu$ m. (b) Quantification of mast cell number in adult lungs. Data represent the average and SEM from 10 non-overlapping, 100X images (0.015 mm<sup>2</sup>) in each adult mouse lung and 3 mice for each condition. \*\* $P < 0.01$ . The relative abundance of mast cells in adult mouse lungs is approximately 20-30-fold lower than that in mouse lungs at P21 (shown in **Figure 3a-d**).
